# Supplementary material for: A mixed-valence copper coordination polymer generated by hydrothermal metal/ligand redox reactionsElectronic supplementary (ESI) available: the effective molar magnetic moment µeff of 1 vs. T. See http://www.rsc.org/suppdata/cc/b2/b203301a/
Source: Royal Society of Chemistry journal article supplement (doi:10.1039/b203301a), 2002-05-21
Supplement: b203301a.pdf [file b203301a.pdf]

*Electronic Supplementary Information***A mixed-valence copper coordination polymer generated by hydrothermal metal/ligand redox reactions****Jun Tao,<sup>a,b</sup> Yong Zhang,<sup>a</sup> Ming-Liang Tong,<sup>a</sup> Xiao-Ming Chen,<sup>a\*</sup> Tan Yuen,<sup>c</sup> C. L. Lin,<sup>c</sup> Xiaoying Huang,<sup>d</sup> Jing Li<sup>d</sup>**<sup>a</sup> School of Chemistry & Chemical Engineering, Zhongshan University, Guangzhou 510275, China.<sup>b</sup> School of Chemistry & Chemical Engineering, Xiamen University, Xiamen 361005, China<sup>c</sup> Department of Physics, Temple University, Philadelphia, Pennsylvania 19122, USA<sup>d</sup> Department of Chemistry, Rutgers University, Piscataway, New Jersey 08854, USA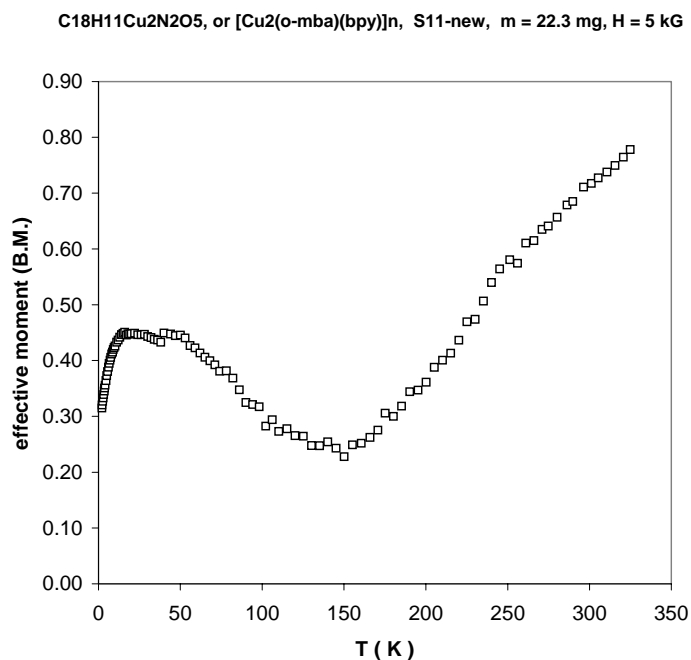

Figure S1. The effective molar magnetic moment  $\mu_{\text{eff}}$  of **1** versus  $T$  per  $\text{Cu}^{\text{II}}$  at 5 kG. The discontinuity near 40 K in the plot is due to the change of a thermometer in the SQUID.
